# Supplementary material for: Concordance of chest x-ray with chest CT by body mass index
Source: PeerJ. 2023 Mar 16;11:e15090. doi: 10.7717/peerj.15090 (PMC10024896; doi:10.7717/peerj.15090)
Supplement: Supplemental Information 1 [file peerj-11-15090-s001.xlsx]

## Sheet: 20230211 CTCXR_NOPHI_07_Final
AGE	SEX	WTKG	HTCM	CXR	CXRCAT	CXRTRUE	CTA	CT	CTCAT	CTTRUE	CONCORDANCE	BMI	FINALDXDISCHARGEDX	Vascular	Respiratory	PNA	CXR1TO4	CT1TO4	BMICAT	RESPVASC	OBESE	DISEASECAT	CXRandCTsum
54	1	63.96	172.72	0	TN	1	0	1	FP	0	0	21.4399	SEPSIS SYNDROME	0	0	0	3	2	1	0	0	Other	1
35	1	75.7499	180.34	0	TN	1	0	0	TN	1	1	23.2915	MUSCULOSKELETAL	0	0	0	3	3	1	0	0	Other	0
60	1	74.2531	160.02	0	TN	1	1	0	TN	1	1	28.9979	MUSCULOSKELETAL	0	0	0	3	3	2	0	0	Other	0
71	1	83.5064	162.56	0	TN	1	1	0	TN	1	1	31.6004	SEPSIS SYNDROME	0	0	0	3	3	3	0	1	Other	0
35	1	113.398	182.88	0	TN	1	1	0	TN	1	1	33.9057	MUSCULOSKELETAL	0	0	0	3	3	3	0	1	Other	0
54	1	134.717	187.96	0	TN	1	1	0	TN	1	1	38.1322	MUSCULOSKELETAL	0	0	0	3	3	3	0	1	Other	0
52	0	101.559	157.48	0	FN	0	0	1	TP	1	0	40.9514	CANCER	0	0	0	1	4	3	0	1	Other	1
66	1	139.48	175.26	0	FN	0	0	0	FN	0	1	45.4093	SEPSIS SYNDROME	0	0	0	1	1	3	0	1	Other	0
75	1	68.0389	182.88	0	TN	1	1	0	TN	1	1	20.3434	CHF	1	0	0	3	3	1	1	0	Vasc	0
61	1	73.0284	165.1	0	FN	0	1	1	TP	1	0	26.7915	CHF	1	0	0	1	4	2	1	0	Vasc	1
65	1	108	188	0	TN	1	1	0	TN	1	1	30.5568	CHF	1	0	0	3	3	3	1	1	Vasc	0
70	1	89.8113	170.18	0	TN	1	1	1	FP	0	0	31.0109	CHF	1	0	0	3	2	3	1	1	Vasc	1
82	1	105.823	175.26	0	TN	1	1	0	TN	1	1	34.452	CHF	1	0	0	3	3	3	1	1	Vasc	0
72	1	115.893	172.72	0	TN	1	1	0	TN	1	1	38.8482	CHF	1	0	0	3	3	3	1	1	Vasc	0
65	1	117.027	170.18	0	FN	0	1	1	TP	1	0	40.4081	CHF	1	0	0	1	4	3	1	1	Vasc	1
62	1	156.943	182.88	0	TN	1	1	0	TN	1	1	46.9256	CHF	1	0	0	3	3	3	1	1	Vasc	0
88	1	63.7	177.8	1	TP	1	0	1	TP	1	1	20.15	CANCER	0	0	0	4	4	1	0	0	Other	2
65	1	64.8637	170.18	1	TP	1	0	1	TP	1	1	22.3967	CANCER	0	0	0	4	4	1	0	0	Other	2
69	1	87.498	185.42	1	FP	0	0	0	TN	1	0	25.4498	NORMAL	0	0	0	2	3	2	0	0	Other	1
59	1	87.5433	185.42	1	TP	1	0	1	TP	1	1	25.463	CANCER	0	0	0	4	4	2	0	0	Other	2
59	1	87.5433	185.42	1	TP	1	1	1	TP	1	1	25.463	CANCER	0	0	0	4	4	2	0	0	Other	2
64	0	82.3724	177.8	1	TP	1	1	1	TP	1	1	26.0566	CANCER	0	0	0	4	4	2	0	0	Other	2
94	1	85.729	167.64	1	TP	1	0	1	TP	1	1	30.5051	MUSCULOSKELETAL	0	0	0	4	4	3	0	1	Other	2
74	1	90.0381	170.18	1	FP	0	1	0	TN	1	0	31.0892	MUSCULOSKELETAL	0	0	0	2	3	3	0	1	Other	1
59	1	115.212	177.8	1	FP	0	0	0	TN	1	0	36.4448	SEPSIS SYNDROME	0	0	0	2	3	3	0	1	Other	1
64	0	63.9	172.7	1	FP	0	1	0	TN	1	0	21.4248	CHF	1	0	0	2	3	1	1	0	Vasc	1
71	1	108.318	185.42	1	FP	0	1	0	TN	1	0	31.5055	CHF	1	0	0	2	3	3	1	1	Vasc	1
72	1	118.569	165.1	1	TP	1	1	1	FP	0	0	43.4988	CHF	1	0	0	4	2	3	1	1	Vasc	2
67	1	169.19	170.18	1	TP	1	1	1	TP	1	1	58.4195	CHF	1	0	0	4	4	3	1	1	Vasc	2
62	1	66.1338	180.34	0	FN	0	1	1	TP	1	0	20.3348	COPD	0	1	0	1	4	1	1	0	Resp	1
57	1	69.3996	170.18	0	TN	1	1	0	TN	1	1	23.9629	PULMONARY INFECTION	0	1	0	3	3	1	1	0	Resp	0
62	1	78.9251	175.26	0	TN	1	1	0	TN	1	1	25.695	COPD	0	1	0	3	3	2	1	0	Resp	0
36	1	93.8	183	0	FN	0	1	1	TP	1	0	28.0092	PULMONARY INFECTION	0	1	1	1	4	2	1	0	Resp	1
68	1	103.374	185.42	0	FN	0	1	1	TP	1	0	30.0675	PE	0	1	0	1	4	3	1	1	Resp	1
61	1	92.9864	175.26	0	TN	1	1	0	TN	1	1	30.2729	COPD	0	1	0	3	3	3	1	1	Resp	0
58	1	114.895	190.5	0	FN	0	1	1	TP	1	0	31.66	PULMONARY INFECTION	0	1	1	1	4	3	1	1	Resp	1
62	1	98	175.26	0	FN	0	1	1	TP	1	0	31.9051	PULMONARY INFECTION	0	1	1	1	4	3	1	1	Resp	1
82	1	99.3	175.26	0	FN	0	1	1	TP	1	0	32.3284	PULMONARY INFECTION	0	1	0	1	4	3	1	1	Resp	1
75	1	74.8427	172.72	1	TP	1	0	1	TP	1	1	25.0879	PULMONARY INFECTION	0	1	1	4	4	2	1	0	Resp	2
44	1	99.7903	193.04	1	TP	1	0	1	TP	1	1	26.779	PE	0	1	0	4	4	2	1	0	Resp	2
59	0	71.6676	162.56	1	FP	0	1	1	TP	1	0	27.1204	PE	0	1	0	2	4	2	1	0	Resp	2
63	1	86.1826	175.26	1	TP	1	0	1	TP	1	1	28.0578	PULMONARY INFECTION	0	1	1	4	4	2	1	0	Resp	2
78	1	102.285	177.8	1	FP	0	1	1	TP	1	0	32.3555	COPD	0	1	0	2	4	3	1	1	Resp	2
78	1	102.285	177.8	1	FP	0	1	1	TP	1	0	32.3555	COPD	0	1	0	2	4	3	1	1	Resp	2
78	1	124.8	190.5	1	FP	0	1	0	TN	1	0	34.3894	COPD	0	1	0	2	3	3	1	1	Resp	1
54	1	99	168.5	1	TP	1	0	1	TP	1	1	34.8687	PULMONARY INFECTION	0	1	1	4	4	3	1	1	Resp	2
56	1	112.3	170.18	1	FP	0	1	0	TN	1	0	38.776	COPD	0	1	0	2	3	3	1	1	Resp	1
58	1	121.563	175.26	1	TP	1	0	1	TP	1	1	39.5763	PULMONARY INFECTION	0	1	1	4	4	3	1	1	Resp	2
59	1	121.563	175.26	1	TP	1	0	1	TP	1	1	39.5763	PULMONARY INFECTION	0	1	1	4	4	3	1	1	Resp	2
58	1	133.583	182.88	1	TP	1	0	1	TP	1	0	39.941	PULMONARY INFECTION	0	1	1	4	4	3	1	1	Resp	2
