# Supplementary material for: Concordance of chest x-ray with chest CT by body mass index
Source: PeerJ. 2023 Mar 16;11:e15090. doi: 10.7717/peerj.15090 (PMC10024896; doi:10.7717/peerj.15090)
Supplement: Supplemental Information 2 [file peerj-11-15090-s002.xlsx]

## Sheet: Sheet1
CODE SHEET
VARIABLE	COMMENTS
AGE	age in years
SEX	0 = female
	1 = male
WTKG	subject weight in kilograms
HTCM	subject height in centimeters
CXR	0 = CXR scan interpretation was negative (either true negative or false negative)
	1 = CXR scan interpretation was positive (either true positive or false positive)
CXRCAT	FN = false negative (scan interpretation was negative, which was found to be incorrect clinically)
	TN = true negative (scan interpretation was negative, which was found to be correct clinically)
	FP = false positive (scan interpretation was positive, which was found to be incorrect clinically)
	TP = true positive (scan interpretation was positive, which was found to be correct clinically)
CXRTRUE	0 = interpretation WAS NOT accurate (either false negative or false positive)
	1 = interpretation WAS accurate (either true negative or true positive)
CTA	0 = CT scan WAS NOT a CT angiogram study
	1 = CT scan WAS a CT angiogram study
CT	0 = CXR scan interpretation was negative (either true negative or false negative)
	1 = CXR scan interpretation was positive (either true positive or false positive)
CTCAT	FN = false negative (scan interpretation was negative, which was found to be incorrect clinically)
	TN = true negative (scan interpretation was negative, which was found to be correct clinically)
	FP = false positive (scan interpretation was positive, which was found to be incorrect clinically)
	TP = true positive (scan interpretation was positive, which was found to be correct clinically)
CTTRUE	0 = interpretation WAS NOT accurate (either false negative or false positive)
	1 = interpretation WAS accurate (either true negative or true positive)
CONCORDANCE	0 = CT findings WERE NOT concordant with CXR findings
	1 = CT findings WERE concordant with CXR findings
BMI	subject body mass index (kg / m2)
FINALDISCHARGE DX	the subject's final clinical diagnosis at discharge from the hospital
Vascular	0 = final clinical diagnosis not a vascular disease
	1 = final clinical diagnosis was a vascular disease
Respiratory	0 = final clinical diagnosis not a respiratory disease
	1 = final clinical diagnosis was a respiratory disease
PNA	0 = final clinical diagnosis not pneumonia
	1 = final clinical diagnosis was pneumonia
CXR1TO4	1 = CXRCAT of false negative
	2 = CXRCAT of false positive
	3 = CXRCAT of true negative
	4 = CXRCAT of true positive
CT1TO4	1 = CTCAT of false negative
	2 = CTCAT of false positive
	3 = CTCAT of true negative
	4 = CTCAT of true positive
BMICAT	1 = BMI < 25 kg/m2
	2 = BMI 25 to 30 kg/m2
	3 = BMI of over 30 kg/m2
RESPVASC	0 = final clinical diagnosis not respiratory and not vascular
	1 = final clinical diagnosis was either respiratory or vascular
OBESE	0 = BMI < 30 kg/m2
	1 = BMI > 30 kg/m2
DISEASECAT	Resp = final clinical diagnosis was a respiratory disease
	Vasc = final clinical diagnosis was a vascular disease
	Other = all other final clinical diagnoses
CXRandCTsum	sum of the CT and CXR variables
	0 = neither CT nor CXR were positive
	1 = either CT or CXR were positive
	2 = both CT and CXR were positive
